1 A pseudorabies virus serine/threonine kinase, US3, promotes retrograde transport in axons via  
2 Akt/mToRC1

3 Running title: PRV US3 activates Akt/mToRC1 to promote axonal transport

4 Andrew D. Esteves<sup>a#</sup>, Orkide O. Koyuncu<sup>a\*</sup>, Lynn W. Enquist<sup>a#</sup>

5 <sup>a</sup>Department of Molecular Biology, Princeton University, Princeton, NJ, USA

6 **Correspondence:** Andrew D. Esteves (aesteves@princeton.edu), Lynn W. Enquist

7 <sup>\*</sup>Present address: Department of Microbiology and Molecular Genetics, School of Medicine,  
8 University of California, Irvine, Irvine, CA, USA

9 (lenquist@princeton.edu)

10 Word Count: Abstract (224),

11 Main Text: (4909)

12 Key words: Akt, PRV, axon, retrograde transport, US3, mToRC1, translation, viral entry, kinase,  
13 intracellular transport

14

## 15 **Abstract**

16           Infection of peripheral axons by alpha herpesviruses (AHVs) is a critical stage in  
17 establishing a life-long infection in the host. Upon entering the cytoplasm of axons, AHV  
18 nucleocapsids and associated inner-tegment proteins must engage the cellular retrograde  
19 transport machinery to promote the long-distance movement of virion components to the  
20 nucleus. The current model outlining this process is incomplete and further investigation is  
21 required to discover all viral and cellular determinants involved as well as the temporality of the  
22 events. Using a modified tri-chamber system, we have discovered a novel role of the  
23 pseudorabies virus (PRV) serine/threonine kinase, US3, in promoting efficient retrograde  
24 transport of nucleocapsids. We discovered that transporting nucleocapsids move at similar  
25 velocities both in the presence and absence of a functional US3 kinase; however fewer  
26 nucleocapsids are moving when US3 is absent and move for shorter periods of time before  
27 stopping, suggesting US3 is required for efficient nucleocapsid engagement with the retrograde  
28 transport machinery. This led to fewer nucleocapsids reaching the cell bodies to produce a  
29 productive infection 12hr later. Furthermore, US3 was responsible for the induction of local  
30 translation in axons as early as 1hpi through the stimulation of a PI3K/Akt-mTORC1. These data  
31 describe a novel role for US3 in the induction of local translation in axons during AHV infection,  
32 a critical step in transport of nucleocapsids to the cell body.

## 33 **Importance**

34 Neurons are highly polarized cells with axons that can reach centimeters in length.  
35 Communication between axons at the periphery and the distant cell body is a relatively slow  
36 process involving the active transport of chemical messengers. There's a need for axons to  
37 respond rapidly to extracellular stimuli. Translation of repressed mRNAs present within the axon

38 occurs to enable rapid, localized responses independently of the cell body. AHVs have evolved a  
39 way to hijack local translation in the axons to promote their transport to the nucleus. We have  
40 determined the cellular mechanism and viral components involved in the induction of axonal  
41 translation. The US3 serine/threonine kinase of PRV activates Akt-mTORC1 signaling pathways  
42 early during infection to promote axonal translation. When US3 is not present, the number of  
43 moving nucleocapsids and their processivity are reduced, suggesting that US3 activity is required  
44 for efficient engagement of nucleocapsids with the retrograde transport machinery.

45

## 46 **Introduction**

47           Members of the alpha herpesvirus (AHV) subfamily, including the human pathogens,  
48 herpes simplex virus type-1 and 2 (HSV-1 and HSV-2), as well as the animal pathogen,  
49 pseudorabies virus (PRV), are pantropic viruses capable of infecting the peripheral (PNS) and  
50 central (CNS) nervous system of their hosts. Infection of the highly polarized PNS at axon  
51 terminals occurs after infection of the epithelial layer. Once in the axonal cytoplasm,  
52 nucleocapsids undergo efficient retrograde transport to the nucleus where the viral DNA is  
53 transcribed and either a productive or a life-long latent infection is established. In natural hosts,  
54 AHVs tend to establish a latent infection. Reactivation from latency results in the anterograde  
55 transport of progeny virion particles in the axon to re-infect the epithelial layer that promotes  
56 spread to new hosts. In rare events, progeny virion particles can spread in the opposite direction  
57 and transsynaptically invade the CNS, often leading to death of the organism. In non-natural  
58 hosts, a productive infection followed by invasion of the CNS and death are the most common <sup>1</sup>.

59           The recruitment of the retrograde transport machinery to mediate the active transport of  
60 virion particles is facilitated by the viral nucleocapsid and inner-tegment proteins (UL36, UL37,  
61 and US3) <sup>2,3</sup>. This process, while dispensable in non-polarized cells, is essential for neuronal  
62 infection via axons due to the large distance between the axon terminal and the cell body <sup>3-5</sup>.  
63 Despite this, the viral and cellular factors involved, and the temporality of the events are not well  
64 understood. Following fusion of the viral and cellular membranes, a breach in the actin  
65 cytoskeleton is created through the activation of cofilin by the US3 protein <sup>6</sup>. The microtubule  
66 plus-tip proteins, EB-1 and CLIP170 also have been shown to aid in this process during HSV-1  
67 infection <sup>7</sup>. The UL36 inner-tegment protein then interacts with dynactin, to recruit the  
68 nucleocapsid complex to dynein, the retrograde-directed motor protein <sup>8,9</sup>. UL37, even though it

69 has not been shown to interact with dynein, is capable of modulating its activity<sup>4</sup>. We have  
70 previously shown that upon infection of axons with PRV, translation of a subset of axonally-  
71 localized mRNA occurs, producing a subset of proteins related to intracellular transport and  
72 cytoskeletal remodeling<sup>10</sup>. Among these was the dynein regulator, Lis1. Local translation in  
73 axons was shown to be essential for the efficient transport of virion components through the  
74 axon; however the mechanism that regulates this is unknown.

75 Translation of cellular mRNA is a tightly regulated process, with the initiation stage  
76 being the most rate-limiting. The PI3K/Akt-mTORC1 signaling pathway is the canonical route by  
77 which translation initiation occurs in eukaryotic cells<sup>11</sup>. AHVs have been demonstrated to  
78 manipulate this signaling pathway to support infection and replication. HSV-2 infection induces  
79 Akt phosphorylation upon binding of gB, on the virion envelope, to  $\alpha_v\beta_3$  integrins leading to  
80 release of intracellular calcium stores to promote entry of nucleocapsids into the cell<sup>12,13</sup>. In  
81 HSV-1 infected cells activation of mTORC1 was induced by the phosphorylation of Akt  
82 substrates in an Akt independent manner. This work demonstrated that a viral kinase could act as  
83 an Akt surrogate to bypass cellular signal pathway control mechanisms to promote constitutive  
84 viral replication<sup>14</sup>. In VZV infected cells Akt phosphorylation is increased and required for  
85 efficient replication<sup>15-17</sup>. PRV infection induces Akt phosphorylation to mediate anti-apoptosis  
86 effects on infected cells<sup>18</sup>. Despite these findings in non-neuronal cells, it is not known if AHV  
87 infection of axons induces Akt signaling pathways. In this paper we investigated whether PRV  
88 infection stimulates the Akt-mTORC1 signaling pathway to induce local translation in axons.

89 US3 is a multifunctional, viral encoded serine/threonine kinase present in the inner-  
90 tegument layer of the virion and one of only two protein kinases conserved by all AHVs<sup>19</sup>.  
91 Although US3 has been shown to be dispensable for virus replication in cell culture, it is vital for

92 viral fitness *in vivo*<sup>20–25</sup>. Some of the most notable functions of US3 include the inhibition of  
93 apoptosis in infected cells through the activation of Akt and NF- $\kappa$ B signaling pathways,  
94 promotion of nuclear egress of newly-made nucleocapsids, and disassembly of actin stress fibers  
95 by cofilin activation<sup>26–28</sup>. Due to its serine/threonine kinase function, known interactions with  
96 Akt, and its presence in the tegument layer, and thus delivered directly to the cytoplasm, we  
97 hypothesized that US3 stimulates Akt-mTORC1 signaling pathways in axons early after  
98 infection, to induce local translation.

99         In this study, we established a novel role for PRV US3 in the induction of translation in  
100 axons via a PI3K/Akt-mTORC1 signaling pathway early after virion entry to promote the  
101 efficient retrograde transport of nucleocapsids to the cell body. In the absence of US3 or Akt  
102 phosphorylation, the number of transporting nucleocapsids and their processivity were  
103 significantly reduced. These events led to a reduction in the number of infected neuronal cell  
104 bodies later in infection. Together, these findings suggest a role for US3 in the continuous  
105 engagement of PRV nucleocapsids with the retrograde transport machinery. Due to the  
106 significance this stage of infection plays in AHV infection of neurons at the axon, US3 may  
107 serve as a target for drugs aiming to prevent the life-long, reactivatable infection caused by  
108 AHVs.

## 109 **Results**

### 110 **Akt is phosphorylated in axons early after PRV infection**

111         To determine if Akt is phosphorylated in axons early after PRV infection, we cultured  
112 primary rat superior cervical ganglion (SCG) neurons *in vitro* in Campenot tri-chambers  
113 (Fig.1A). This cell culture system allows for the fluidic separation of neuronal cell bodies (in the

114 S compartment) from axons (in the N compartment), enabling us to infect pure populations of  
115 axons and monitor responses independently of the cell bodies<sup>29</sup>. N compartment axons were  
116 infected with 10<sup>6</sup> plaque forming units (PFU) of a PRV-Becker recombinant expressing a  
117 monomeric red fluorescent protein (mRFP)-tagged capsid protein (VP26) termed PRV 180. Akt  
118 phosphorylation was monitored using a phospho (p-) S<sup>473</sup>-Akt antibody. Phosphorylation at  
119 serine 473 is the most well-known mechanism of Akt activation<sup>30</sup> and can be observed as early  
120 as 30 minutes post infection (mpi) in axons and continues to at least 180mpi (Fig.1B), indicating  
121 that PRV infection does induce Akt phosphorylation in axons. Furthermore, when axons in the N  
122 compartment were pretreated with LY294,002 (a potent and selective PI3K inhibitor) prior to  
123 infection, no Akt phosphorylation was observed, suggesting that PRV-induced Akt  
124 phosphorylation is PI3K-dependent (Fig.1C). When axons were pretreated with the mTORC1  
125 inhibitor rapamycin, or the translation inhibitor cycloheximide, Akt phosphorylation did occur  
126 (Fig.1C). No change in Akt phosphorylation occurred in S compartment cell bodies 1hour post  
127 infection (hpi) when the N compartment was infected, demonstrating that the infection and  
128 intracellular signals do not reach the cell body in that time (Fig.1D).

### 129 **Akt phosphorylation in axons is required for efficient retrograde transport of PRV** 130 **nucleocapsids**

131 Next, we determined whether infection-induced Akt phosphorylation in axons affected  
132 the spread of PRV to the distant cell body. N compartments were treated with a green lipophilic  
133 dye, Fast-DiO, to label the membranes of all axons in the N compartment and their attached cell  
134 bodies in the S compartment such that only the cell bodies with axons extended into the N  
135 compartment were labeled. 12 hours post DiO staining, N compartments were infected with PRV  
136 180 (Fig.2A). At 12hpi, infected cell bodies were visualized by the presence of red fluorescence

137 from the mRFP-VP26 fusion protein (Fig.2B). The presence of dual-colored cell bodies  
138 (expressing red and green fluorescence) were those who were directly infected via axons in the N  
139 compartment. The ratio of dual-colored cell bodies to total green cell bodies represents the  
140 efficiency of retrograde infection. When N compartment axons were pretreated with Akt  
141 inhibitor VIII for 1 hour prior to infection, we observed a  $\sim 56.4\% \pm 14.7\%$  reduction in the  
142 number of dual-colored cell bodies compared to PRV 180 infection alone. Additionally, when  
143 axons were pretreated with LY294,002, rapamycin, or cycloheximide, dual-colored cell bodies  
144 were reduced by  $\sim 48\% \pm 16.2\%$ ,  $\sim 58\% \pm 17.6\%$ , and  $\sim 65.7 \pm 9.5\%$  respectively. Ras/MAPK is  
145 also known to promote translation by signaling through mTORC1<sup>31-36</sup>, however pretreatment of  
146 axons with the Erk1/2 inhibitor, U0126, had no significant effect on retrograde infection ( $\sim 8.3\%$   
147  $\pm 14\%$ ) (Fig.2C).

148         Local translation of axonal mRNA after PRV infection promoted the efficient retrograde  
149 transport of nucleocapsids through the axon<sup>10</sup>. To determine if Akt-mTORC1 is also required for  
150 efficient transport, N compartment axons were infected with PRV 180 and at 2hpi, videos of  
151 fluorescent nucleocapsids trafficking through the M (middle) compartment were recorded  
152 (Fig.3A). Maximum intensity projections and kymographs were created from the videos of  
153 moving nucleocapsids to analyze transport kinetics (Fig.3B). Moving nucleocapsids were  
154 represented as continuous “tracks”. When N compartments were pretreated with LY294,002, Akt  
155 inhibitor VIII, rapamycin, or cycloheximide the number of moving nucleocapsids was reduced  
156 by  $\sim 75.8\% \pm 24.4\%$ ,  $\sim 76.3\% \pm 24.4\%$ ,  $\sim 79\% \pm 22.8\%$ ,  $\sim 75.8\% \pm 40.8\%$  respectively compared  
157 to PRV 180 infection alone (Fig.3C). The net displacement of moving nucleocapsids (length of  
158 tracks) was also reduced by  $\sim 50\%$  when these inhibitors were present (Fig.3D). Nevertheless, the  
159 velocity of nucleocapsids that were moving in each condition was the same (Fig.3E), suggesting



160 that engagement with the transport machinery, not the transport speed was disrupted. U0126  
161 treatment had no significant effect on nucleocapsid transport or processivity. Taken together,  
162 these data demonstrate that Akt-mTORC1 signaling is induced by PRV infection in axons and is  
163 required for efficient retrograde transport of nucleocapsids. These effects were comparable to  
164 those observed when translation was blocked, suggesting Akt-mTORC1 activation acts early after  
165 PRV infection to promote translation in axons.

### 166 **Akt phosphorylation in axons requires PRV US3 ser/thr kinase**

167 HSV-2 induces Akt phosphorylation upon binding of the glycoprotein gB on the virion  
168 envelope with  $\alpha_v\beta_3$  integrins leading to release of intracellular calcium stores to promote entry of  
169 nucleocapsids into the cytoplasm<sup>13</sup>. We determined if virion binding to the cell surface or fusion  
170 of the viral and cellular membranes were responsible for Akt phosphorylation and if Akt  
171 phosphorylation affected transport directly or indirectly by regulating entry of nucleocapsids into  
172 the cytoplasm.

173 N compartment axons were infected with PRV-Becker mutants lacking either  
174 glycoprotein D (gD) (PRV GS442), the viral envelope protein required for specific PRV binding  
175 to the nectin-1 cell receptor, or glycoprotein B (gB) (PRV 233), the viral envelope protein  
176 required for fusion of the viral and cell membranes. Akt phosphorylation was monitored via  
177 western blot (Fig.4) and was unchanged after infection with either of these mutants suggesting  
178 that both binding and membrane fusion are required for Akt phosphorylation.

179 To determine if Akt phosphorylation was induced by PRV after entry into the cell, we  
180 investigated the role of US3. US3 is an AHV inner-tegment protein with ser/thr kinase  
181 function<sup>19</sup>. US3 induces phosphorylation of Akt (in PRV) and downstream Akt substrates (in

182 HSV-1)<sup>14,18</sup>. When we infected axons with a PRV-Becker mutant lacking US3 (PRV 813NS) or  
183 a mutant lacking a functional kinase domain (PRV 815KD), no Akt phosphorylation was  
184 observed (Fig.5). When axons were infected with a revertant of PRV 813NS, termed PRV 813R,  
185 Akt phosphorylation was restored (Fig.5). These data indicate that US3 is responsible for  
186 inducing Akt phosphorylation after PRV infection in axons.

187 To determine if US3, and by extension Akt phosphorylation, are required for entry of  
188 PRV into cells, rat fibroblasts (Rat2) were infected with multiplicity of infection (MOI) of 5 of  
189 either PRV 180 or a  $\Delta$ US3 mutant with the mRFP-VP26 fusion (PRV823) at 4C, a temperature  
190 permissive to binding, but not entry. Ihipi cultures were washed to remove inoculum and the  
191 temperature was brought up to 37°C to allow for entry. After 15 minutes cells were washed with  
192 a low pH citrate buffer (pH 3) to inactivate any un-entered virus particles and the infection was  
193 permitted to continue for another hour. Cells were fixed and nucleocapsid fluorescence was  
194 visualized by fluorescence microscopy (Fig.6). Nucleocapsids present within the cytoplasm were  
195 counted manually and no significant difference was seen indicating US3 and Akt  
196 phosphorylation do not affect PRV entry in these cells.

197 Next, we determined if US3 is required for efficient retrograde infection of neurons using  
198 the technique described in Fig.2A. Compared to infection with PRV 180, infection with PRV  
199 823 in axons led to a  $\sim 44.7\% \pm 23.8\%$  reduction in dual-colored cell bodies in the S  
200 compartment (Fig.2B). PRV 823 infection in axons in the N compartment also led to a  $\sim 47.3\% \pm$   
201  $38.4\%$  reduction in the number of trafficking nucleocapsids in the M compartment when  
202 compared to PRV 180 (Fig.3C). PRV 823 transport kinetics were comparable to those of PRV  
203 180 when Akt-mTORC1 signaling or translation was disrupted (Fig.3D, E); net displacement  
204 was significantly reduced ( $\sim 37\% \pm 31.2\%$ ), but not transport velocity. Taken together, these data

205 suggest US3 mediates efficient retrograde transport of PRV nucleocapsids through axons by  
206 inducing an Akt-mTORC1 signaling pathway.

### 207 **US3 and Akt phosphorylation are required for virus-induced local translation in axons**

208 We directly tested whether US3 and Akt phosphorylation were required for translation by  
209 performing a surface sensing of translation (SUnSET) assay. Axons in the N compartment were  
210 either untreated or treated with Akt inhibitor VIII, cycloheximide, or U0126 then infected with  
211 PRV 180 or PRV 813NS. Puromycin was added to both N and S compartments to label nascent  
212 peptides 15 minutes prior to harvesting for western blot (Fig. 7A). Nascent peptides were  
213 visualized using a monoclonal puromycin antibody. Infection of axons with PRV 180 but not  
214 PRV 813NS led to an increase in puromycin incorporation when compared to mock, indicating  
215 that US3 is required for PRV-induced translation in axons. When Akt phosphorylation and  
216 translation were inhibited, puromycin incorporation did not increase past mock level indicating  
217 Akt phosphorylation is also required for translation to occur. Pretreatment with U0126 had no  
218 effect on puromycin incorporation showing the Ras/MAPK pathway does not affect PRV-  
219 induced translation in axons. (Fig.7B).

### 220 **Discussion**

221 PNS neurons are highly polarized; with axon terminals extending centimeters away from  
222 their cell bodies. Accordingly, the transport of molecular messengers over these long distances is  
223 highly regulated<sup>37</sup>. Axons contain within them the complete set of protein synthesis machinery,  
224 including multiple subsets of localized mRNA that are used to synthesize proteins in response to  
225 changes in the extracellular environment and send messages to the cell body to produce a global  
226 response to stimulus<sup>38,39</sup>. PRV hijacks these processes to promote its efficient retrograde

227 transport from the site of infection, in the axon, to the cell body<sup>10</sup>. In this study, we have  
228 discovered that PRV utilizes an Akt-mTORC1 signaling pathway to induce translation in axons at  
229 early time points after infection. The inner-tegment protein kinase, US3, is required for the  
230 induction of this signaling pathway and acts upstream of PI3K to promote Akt phosphorylation  
231 (Fig.8).

232 Infection of axons with PRV 180 in the presence of the PI3K inhibitor, LY294,002,  
233 significantly reduced the number of moving nucleocapsids (Fig. 3C), and reduced the distance  
234 nucleocapsids traveled before stopping (Fig.3D). US3 must act upstream of PI3K to promote  
235 efficient transport, but it is unknown if PI3K is the direct kinase target of US3. Earlier studies  
236 have shown that US3 is responsible for the reorganization of the actin cytoskeleton via cofilin  
237 activation<sup>6</sup>. US3 interacts directly with group 1 PAKs (p-21 activated kinases) to promote  
238 cofilin dephosphorylation (activation), leading to disassembly of filamentous actin and the entry  
239 of virion tegument and nucleocapsid into the cytoplasm<sup>40</sup>. Group 1 PAKs play an important role  
240 in cytoskeleton rearrangement and apoptosis signal transduction<sup>41-48</sup> and have been shown to  
241 interact with various members of PI3K and Akt signaling pathways<sup>49</sup>. It is possible that the  
242 cross-talk between group1 PAKs and the PI3K-Akt signaling pathway could be utilized by US3  
243 to promote cytoskeletal rearrangements and local translation.

244 When US3 was absent or PI3K/Akt-mTORC1 signaling was disrupted, we observed a  
245 significant reduction in the number of transporting nucleocapsids and their processivity (Fig.3).  
246 Under these conditions, nucleocapsids moved shorter distances before stopping; however the  
247 velocity of these nucleocapsids while in motion was similar to wild-type infection without  
248 inhibitor present. This suggests nucleocapsids had difficulty engaging with the transport  
249 machinery rather than difficulty transporting once engaged. These results were similar to what

250 was seen for PRV and HSV-1 mutants when the R2 domain of UL37 inner-tegument protein was  
251 altered <sup>4</sup>. The UL37-R2 mutant replicates well in peripheral tissue but is unable to move  
252 efficiently in peripheral neurons. As a result, the mutant cannot establish life-long infection in  
253 the host, a property that would provide a new possibility for vaccine design <sup>4</sup>. It's possible that  
254 the use of a US3-null-UL37-R2 mutant would provide a similar or additive effect by further  
255 reducing the chance of retrograde infection in peripheral neurons.

256 Long-distance transport in axons requires the microtubule network and associated motor  
257 proteins. The kinesin motor proteins mediate anterograde (plus-end directed) transport and  
258 dynein motor proteins mediate retrograde (minus-end directed) transport <sup>50</sup>. Dynein is a  
259 multisubunit complex composed of two heavy-chains, two intermediate chains, and two light  
260 chains that regulate motor activity and interactions with cellular cargo <sup>51-54</sup>. To achieve  
261 spatiotemporal regulation of transport, various accessory factors associate with the dynein  
262 complex; one such factor is dynactin<sup>50</sup>. The UL36 inner-tegument protein interacts with dynactin  
263 to recruit nucleocapsids to dynein<sup>8,9</sup>; however this interaction alone is not sufficient to promote  
264 efficient transport. Dynein must be phosphorylated to obtain an active conformation<sup>50,51,55-57</sup>.  
265 Recently, it was shown that upon infection of epithelial cells with HSV-1, dynein intermediate  
266 chain 1B was phosphorylated at position S80 in an Akt and PKC independent manner <sup>58</sup>. We  
267 have also observed dynein phosphorylation (at position T88) during PRV infection that was US3  
268 dependent (A. D. Esteves and L. W. Enquist, unpublished data). US3's kinase function could be  
269 mediating the activation of dynein throughout the retrograde transport process. More work needs  
270 to be done to determine the cause and function of dynein phosphorylation during AHV infection.

271 Axonal infection with PRV mutants lacking either gD or gB, the glycoproteins that  
272 mediate virion binding to the plasma membrane and carry out membrane fusion, were unable to

273 stimulate Akt phosphorylation (Fig.4). These observations suggested that Akt is phosphorylated  
274 after entry of the nucleocapsid and tegument proteins in the cytoplasm. These findings are  
275 different from what was observed after HSV-1 and HSV-2 infection. Infection with these AHVs  
276 lead to the stimulation of a low-level  $\text{Ca}^{2+}$  fluctuation following binding of gD or gB to the  
277 nectin-1 co-receptor and heparin sulfate proteoglycans on the cell surface. This is followed by an  
278 interaction between Akt and gB leading to Akt phosphorylation, a larger  $\text{Ca}^{2+}$  fluctuation and  
279 entry of the nucleocapsid and tegument into the cytoplasm<sup>13</sup>. We have shown that PRV  
280 nucleocapsid entry does not depend on US3, and by extension, Akt phosphorylation (Fig.6).  
281 However, we have not investigated the potential for the induction of  $\text{Ca}^{2+}$  fluctuation during  
282 infection and whether or not it participates in the retrograde transport process. Future work needs  
283 to be done to determine the effects of  $\text{Ca}^{2+}$  signaling in PRV infection.

284 Our work has revealed a novel role for US3 in the promotion of efficient microtubule-  
285 based transport of PRV nucleocapsids in axons. We determined that US3 signals through an Akt-  
286 mTORC1 signaling pathway, upstream of PI3K, to induce translation of localized, repressed  
287 mRNAs, a process required for efficient retrograde transport. The absence of US3 or the  
288 disruption of Akt-mTORC1 not only reduced the number of transporting nucleocapsids but also  
289 negatively impacted the processivity of nucleocapsids moving through the axon, suggesting  
290 engagement with the dynein-motor complex was disrupted. This work helps to clarify the viral  
291 and cellular factors involved in PRV entry and retrograde transport in axons and identifies US3  
292 as a potential target for therapies aiming to prevent the spread of AHVs in the nervous system.

293           **Acknowledgements**

294           This work was supported by the US National Institute of Health grant (5R37NS033506)  
295 to Lynn W. Enquist. The authors declare that they have no competing interests.

296           We thank Kevin Pfister for providing the phospho-dynein antibodies used in this study  
297 and Heath E. Johnson for assistance with particle tracking automation.

298

## 299 **Materials and Methods**

### 300 **Primary neuronal culture**

301 Superior cervical ganglia (SCG) neurons were isolated from embryonic day 17 Sprague-  
302 Dawley rat embryos and cultured as previously described<sup>29</sup>. Briefly, SCG were trypsinized and  
303 mechanically dissociated. 35mm cell culture dishes were coated with poly-DL-ornithine (Sigma-  
304 Aldrich) and laminin (Invitrogen) then fitted with a Campenot tri-chamber (CAMP320 isolator  
305 rings, Tyler Research) using autoclaved silicone vacuum grease as an adherent. Dissociated SCG  
306 were seeded in one compartment (the S-compartment) of the tri-chamber filled with neurobasal  
307 medium (Life Technologies; 21103049) + 50x B-27 supplement (Life Technologies; 17504044)  
308 + 100x Penicillin-Streptomycin-Glutamine (ThermoFisher; 10378016) + 80ng/ml NGF  
309 (ThermoFisher; 13257019) and left to grow for ~3weeks with media changes every 7 days.

### 310 **Cell lines and virus stocks**

311 Porcine kidney epithelial cells (PK15, ATCC), and Rat2 cells (ATCC) were maintained  
312 in Dulbecco modified Eagle medium (DMEM, Hyclone) + 10% fetal bovine serum (FBS,  
313 Hyclone) + 1% penicillin-streptomycin (Hyclone). Virus propagation and titer were performed in  
314 PK15 cells unless otherwise specified. Rat2 cells were used for synchronized infection assays.  
315 LP cells (gB complementing cells derived from PK15 cells) were used to grow PRV 233 virus  
316 stocks (Lisa Pomeranz, personal communication). 100ug/ml Geneticin (G418) (InVivo Gen, ant-  
317 gn-1) was added to culture every 5<sup>th</sup> passage to maintain gB expression. G5 cells (gD  
318 complementing cells derived from PK15 cells) were used to grow PRV GS442 virus stocks<sup>59</sup>.  
319 2.5mM L-histidinol dihydrochloride (Sigma, H6647) was added to cultures every 5<sup>th</sup> passage to  
320 maintain gD expression. All cells were incubated at 37°C, and 5% CO<sub>2</sub>.



321 Unless otherwise specified, virus infections of PK15 and Rat2 cells were performed with  
322 DMEM + 2% FBS. Titers of virus stocks were determined as Plaque forming units (PFU). For  
323 live-cell imaging PRV 180 and PRV 823 stocks were used within 2 weeks of production for no  
324 more than one freeze-thaw cycle to preserve the fluorophore intensity. Virus stocks used are as  
325 follows:

| Virus Strain | Genotype                                         | Reference |
|--------------|--------------------------------------------------|-----------|
| PRV 180      | Becker wild-type strain with mRFP-VP26 fusion    | 60        |
| PRV 813NS    | US3-null Becker strain; nonsense mutation        | 20        |
| PRV 813R     | Revertant of 813NS                               | 20        |
| PRV 823      | US3-null Becker strain, mRFP-VP26 fusion         | 20        |
| PRV GS442    | gD-null Becker strain, diffusible GFP expression | 59        |
| PRV 233      | gB-null Becker strain, diffusible GFP expression | 61        |

326

### 327 **Antibodies and chemicals**

328 All antibodies were diluted in TBS-T (Tris buffered saline-Tween, 0.1%) treated with 3%  
329 bovine serum albumin (BSA) and stored in -20°C unless otherwise specified. Rabbit phospho-  
330 Akt (ser473)(D9E) (Cell Signaling Technology, 4060) was used at 1:1,000 for western blot  
331 (WB). Rabbit Akt antibody (Cell Signaling Technology, 9272) was used at 1:1,000 to detect total  
332 Akt in WB. Monoclonal anti-beta-actin antibody (Sigma Aldrich, A1978) was used at 1:10,000  
333 for WB. Mouse monoclonal US3 7H10.21<sup>20</sup> was used at 1:1,000 for WB. Rabbit phospho-  
334 dynein-threonine88 was a gift from Kevin Pfister and was used at 1:300 for WB. Mouse  
335 recombinant anti-cytoplasmic dynein intermediate chain (74.1) (Abcam, ab23905) was used at

336 1:500 for WB. Mouse monoclonal anti-puromycin clone 4G11 (EMD Millipore, MABE342) was  
337 used at 1:2,000 for WB.

338 All drug treatments occurred 1hr prior to infection, concentrations represent final  
339 experimental concentrations, and drugs were resuspended in DMSO unless otherwise specified.  
340 LY294,002 (Cell Signaling Technology, 9901) was used at a concentration of 20uM. Akt  
341 inhibitor VIII (Sigma, 124018) was used at a concentration of 5uM. Rapamycin (Sigma, 553210)  
342 was used at a concentration of 100uM. U0126 (Sigma, 662009) was used at a concentration of  
343 10uM. Puromycin (AG Scientific, P-1033-SOL) was solubilized in deionized H<sub>2</sub>O and used at a  
344 concentration of 1ug/ml. FAST-DiO (ThermoFisher, D3898) was used a concentration of 5ug/ml  
345 and incubated for 12hr prior to infection (24hr prior to imaging).

#### 346 **Western Blotting**

347 SCG neurons in tri-chambers were seeded at a density of 1 SCG per S compartment.  
348 Dishes were washed 3x with warm PBS (phosphor buffered saline) then incubated with  
349 neurobasal media + 100x penicillin-streptomycin-glutamine (note the lack of B-27 supplement)  
350 for 12hr prior to infection. Either axons in the N compartment or cell bodies in the S  
351 compartment were lysed in the chamber with 40ul of 2x Laemmli buffer prepared from a dilution  
352 of 5x Laemmli buffer (10% SDS, 300mM Tris-Cl pH = 6.8, 0.05% bromophenol blue, 100mM  
353 DTT, and 50% Glycerol in ddH<sub>2</sub>O). Lysates were boiled at 90°C for 5min then cooled on ice.  
354 Proteins were separated by SDS-PAGE and 4-12% gradient NuPAGE Bis/Tris gels. Proteins  
355 were transferred to nitrocellulose membranes (GE Healthcare, 45-0040002) using a Trans-Blot  
356 SD semi-dry transfer cell (Bio Rad). Membranes were blocked using 1x Pierce Clear Milk  
357 Blocking Buffer (ThermoFisher, 37587) for 30min at room temperature (RT) then washed 3x

358 with TBS-T. Membranes were incubated in primary antibody dilution over night at 4°C followed  
359 by 3x TBS-T washes then incubation with horseradish peroxidase-conjugated secondary  
360 antibody (1:10,000 dilutions in 3% BSA-TBS-T) for 45min at RT and a final 3x washes with  
361 TBS-T. Chemiluminescent substrate, Supersignal West Pico (ThermoFisher, 34080), West Dura  
362 Extended Duration Substrate (ThermoFisher, 34075), West Femto Maximum Sensitivity  
363 Substrate (ThermoFisher, 34094), or West Atto Ultimate Sensitivity Substrate (ThermoFisher,  
364 A38554) were added to the membranes for 5min at RT. Protein bands were visualized by  
365 exposing the membranes on HyBlot CL autoradiography film (Denville scientific, E3018).

#### 366 **SUnSET assay for labeling nascent peptides**

367 Puromycin was added to the chamber compartment to be analyzed 15 minutes prior to  
368 harvest. The rest of the protocol follows the same as for WB. Puromycin-labeled peptides were  
369 detected with puromycin antibodies. See “Antibodies and chemicals” for the primary antibody  
370 used.

#### 371 **Synchronized infection assay**

372 Rat2 cells in culture were cooled to 4°C. PRV 180 or PRV823 inoculumns were added at  
373 an MOI of 5 and virion absorption to cells was allowed to occur for 1hr at 4°C before media was  
374 aspirated and cells were washed with chilled PBS 3x. Chilled 2% FBS DMEM was added to the  
375 dish and temperature was brought up to 37°C for 15 minutes to enable virion entry. Media was  
376 removed and infected cells were washed once with a low pH citrate buffer for 2min to inactivate  
377 virions that had not entered cells. Citrate buffer was removed and cells were washed 3x with  
378 PBS at RT before warm 2% FBS DMEM was added. Infected cells were incubated for 1 hour at  
379 37°C.

380 Cells were fixed using 4% paraformaldehyde (PFA) for 10min at RT and permeabilized  
381 with 0.1% Triton x-100 (Sigma, T8787) for 10min at RT. After permeabilization, plates were  
382 blocked for 1hr at RT with 1% BSA in PBS, washed 3x with PBS then treated with DAPI  
383 (ThermoFisher, 62248) to stain cell nuclei for 5min at RT in the dark with 1ug/ml DAPI in 0.1%  
384 BSA PBS. Cells were washed 3x with PBS then imaged. Total and average number of red-  
385 fluorescent nucleocapsids per cell in a single field of view (FOV) were manually counted using  
386 NIS Elements Advanced Research software (Nikon).

### 387 **Retrograde transport assay**

388 SCGs were seeded at 2/3 of an SCG per S compartment. Fast- DiO was added to axons in  
389 the N compartment 12hr prior to infection. N compartments were either untreated or treated with  
390 LY294,002, Akt inhibitor VIII, rapamycin, cycloheximide, or U0126 1hr prior to infection.  
391 Axons in N compartments were infected with  $10^6$  PFU of PRV. At 6hr post infection unabsorbed  
392 virus inoculum and drug in N compartment were washed out and replaced with fresh neurobasal  
393 medium. At 12hr post infection cell bodies in the S compartment were tile-imaged for mRFP-  
394 VP26 (red) and DiO (green). Total numbers of green and dual-colored particles (red and green)  
395 were manually counted (see synchronized infection assay). The ratio of dual-colored cell bodies  
396 to total green cell bodies was determined per S compartment and averaged for all conditions.

### 397 **Single particle tracking in tri-chambers**

398 SCGs were seeded at 2/3 of an SCG per S compartment with optical plastic tissue culture  
399 dishes (Ibidi, 81156-400). N compartment axons were either untreated or treated with drug for  
400 1hr prior to infection. Infections were initiated at  $10^6$  PFU for 2hr before time-lapse imaging was  
401 used to visualize moving fluorescent virus particles in the M compartment. 30 second recordings

402 of a single FOV were completed at approximately 2 frames per second. The total number of  
403 moving virus particles were counted. For instantaneous velocity measurements the TrackMate  
404 plugin for imageJ was used. Velocities were parsed into bins in a histogram ranging from -  
405 4um/sec (the maximum anterograde velocity recorded) and +4um/sec (the maximum retrograde  
406 velocity recorded) with intervals of 1um/sec. Instantaneous velocities in bins 1um/sec to 4um/sec  
407 were averaged across all conditions to determine the average velocity of all moving virion  
408 particles. Velocities in the 0um/sec bin were assumed to be stationary particles and were not  
409 included in the average velocity measurements.

#### 410 **Imaging processing and analysis**

411 All imaging was conducted on a Nikon Eclipse Ti inverted epifluorescence microscope  
412 using a CoolSNAP ES2 CCD camera. Images and movies were processed using ImageJ<sup>62</sup> and  
413 NIS Elements Advanced Research software (Nikon). Comparative images were all captured with  
414 the same exposure times, brightness and contrast adjustments were applied to the entire image  
415 and alterations were applied equally across conditions.

416 To analyze trafficking virus particles in the M compartment, imageJ was used to create  
417 maximum intensity projections of all videos to visualize the path of moving particles. Particle  
418 trajectories were manually counted and taken to represent a single moving particle. The  
419 directionality and velocity of a moving particle was visualized using the imageJ multi  
420 kymograph tool. Particle lengths were calculated by measuring the total particle distance traveled  
421 over the course of the 30sec movie using the segmented line tool in imageJ. In order to be  
422 counted, particles must not enter or exit the FOV during the entire 30sec recording time.

#### 423 **Statistical analysis**

424 All data were analyzed using GraphPad Prism 9 (GaphPad Software, La Jolla California  
425 USA, [www.graphpad.com](http://www.graphpad.com)). Figure legends provide the statistical test used for each analysis.

426

427 **References**

- 428 1. Pomeranz, L. E., Reynolds, A. E. & Hengartner, C. J. Molecular Biology of Pseudorabies  
429 Virus: Impact on Neurovirology and Veterinary Medicine. *Microbiol. Mol. Biol. Rev.* **69**,  
430 462–500 (2005).
- 431 2. Döhner, K. *et al.* Function of dynein and dynactin in herpes simplex virus capsid  
432 transport. *Mol. Biol. Cell* **13**, 2795–2809 (2002).
- 433 3. Sodeik, B., Ebersold, M. & Helenius, A. Microtubule-mediated transport of incoming  
434 herpes simplex virus 1 capsids to the nucleus. *J. Cell Biol.* **136**, 1007–1021 (1997).
- 435 4. Richards, A. L. *et al.* The pUL37 tegument protein guides alpha-herpesvirus retrograde  
436 axonal transport to promote neuroinvasion. *PLOS Pathog.* **13**, e1006741 (2017).
- 437 5. Sekine, E., Schmidt, N., Gaboriau, D. & O’Hare, P. Spatiotemporal dynamics of HSV  
438 genome nuclear entry and compaction state transitions using bioorthogonal chemistry and  
439 super-resolution microscopy. *PLOS Pathog.* **13**, e1006721 (2017).
- 440 6. Jacob, T. *et al.* Alphaherpesviral US3 Kinase Induces Cofilin Dephosphorylation To  
441 Reorganize the Actin Cytoskeleton. *J. Virol.* **87**, 4121 (2013).
- 442 7. Jovasevic, V., Naghavi, M. H. & Walsh, D. Microtubule plus end–associated CLIP-170  
443 initiates HSV-1 retrograde transport in primary human cells. *J. Cell Biol.* **211**, 323 (2015).
- 444 8. Radtke, K. *et al.* Plus- and minus-end directed microtubule motors bind simultaneously to  
445 herpes simplex virus capsids using different inner tegument structures. *PLoS Pathog.* **6**, 1–  
446 20 (2010).

- 447 9. Zaichick, K. *et al.* The herpesvirus VP1/2 protein is an effector of dynein-mediated capsid  
448 transport and neuroinvasion. *Cell Host Microbe* **13**, 193–203 (2013).
- 449 10. Koyuncu, O., Perlman, D. & Enquist, L. W. Efficient retrograde transport of pseudorabies  
450 virus within neurons requires local protein synthesis in axons. *Cell Host Microbe* **13**, 54–  
451 66 (2013).
- 452 11. Sonenberg, N. & Hinnebusch, A. Regulation of translation initiation in eukaryotes:  
453 mechanisms and biological targets. *Cell* **136**, 731–745 (2009).
- 454 12. Cheshenko, N., Liu, W., Satlin, L. M. & Herold, B. C. Multiple Receptor Interactions  
455 Trigger Release of Membrane and Intracellular Calcium Stores Critical for Herpes  
456 Simplex Virus Entry. *Mol. Biol. Cell* **18**, 3119 (2007).
- 457 13. Cheshenko, N. *et al.* Herpes simplex virus type 2 glycoprotein H interacts with integrin  
458  $\alpha v \beta 3$  to facilitate viral entry and calcium signaling in human genital tract epithelial cells.  
459 *J. Virol.* **88**, 10026–10038 (2014).
- 460 14. Chuluunbaatar, U. & Mohr, I. A herpesvirus kinase that masquerades as Akt: You don't  
461 have to look like Akt, to act like it. *Cell Cycle* **10**, 2064–2068 (2011).
- 462 15. Liu, X. & Cohen, J. Varicella-zoster virus ORF12 protein activates the  
463 phosphatidylinositol 3-kinase/Akt pathway to regulate cell cycle progression. *J. Virol.* **87**,  
464 1842–1848 (2013).
- 465 16. Nandini, S. *et al.* Single-cell mass cytometry analysis of human tonsil T cell remodeling  
466 by varicella zoster virus. *Cell Rep.* **8**, 633–645 (2014).
- 467 17. Rahaus, M., N, D. & MH, W. Varicella-zoster virus requires a functional PI3K/Akt/GSK-



- 468           3alpha/beta signaling cascade for efficient replication. *Cell. Signal.* **19**, 312–320 (2007).
- 469   18.   Ching-Dong, C. *et al.* Suppression of apoptosis by pseudorabies virus Us3 protein kinase  
470           through the activation of PI3-K/Akt and NF- $\kappa$ B pathways. *Res. Vet. Sci.* **95**, 764–774  
471           (2013).
- 472   19.   Deruelle, M. & Favoreel, H. Keep it in the subfamily: the conserved alphaherpesvirus  
473           US3 protein kinase. *J. Gen. Virol.* **92**, 18–30 (2011).
- 474   20.   Olsen, L. M., Ch'ng, T. H., Card, J. P. & Enquist, L. W. Role of Pseudorabies Virus Us3  
475           Protein Kinase during Neuronal Infection. *J. Virol.* **80**, 6387–6398 (2006).
- 476   21.   Frame, M., FC, P., DJ, M., HS, M. & DP, L. Identification of the herpes simplex virus  
477           protein kinase as the product of viral gene US3. *J. Gen. Virol.* **68** ( Pt 10, 2699–2704  
478           (1987).
- 479   22.   Hanks, S., AM, Q. & T, H. The protein kinase family: conserved features and deduced  
480           phylogeny of the catalytic domains. *Science* **241**, 42–52 (1988).
- 481   23.   Heineman, T. C., Seidel, K. & Cohen, J. I. The varicella-zoster virus ORF66 protein  
482           induces kinase activity and is dispensable for viral replication. *J. Virol.* **70**, 7312 (1996).
- 483   24.   McGeoch, D. & Davison, A. Alphaherpesviruses possess a gene homologous to the  
484           protein kinase gene family of eukaryotes and retroviruses. *Nucleic Acids Res.* **14**, 1765–  
485           1777 (1986).
- 486   25.   Purves, F., RM, L., DP, L. & B, R. Herpes simplex virus 1 protein kinase is encoded by  
487           open reading frame US3 which is not essential for virus growth in cell culture. *J. Virol.*  
488           **61**, 2896–2901 (1987).

- 489 26. Brzozowska, A., M, R., AD, L. & K, B.-S. Point mutations in BHV-1 Us3 gene abolish its  
490 ability to induce cytoskeletal changes in various cell types. *Vet. Microbiol.* **143**, 8–13  
491 (2010).
- 492 27. Granstedt, A. E., Bosse, J. B., Thiberge, S. Y. & Enquist, L. W. In vivo imaging of  
493 alphaherpesvirus infection reveals synchronized activity dependent on axonal sorting of  
494 viral proteins. *Proc. Natl. Acad. Sci. U. S. A.* **110**, (2013).
- 495 28. Mettenleiter, T., BG, K. & H, G. Herpesvirus assembly: an update. *Virus Res.* **143**, 222–  
496 234 (2009).
- 497 29. Curanović, D., Ch’ng, T. H., Szpara, M. & Enquist, L. Compartmented Neuron Cultures  
498 for Directional Infection by Alpha Herpesviruses. *Curr. Protoc. Cell Biol.* **CHAPTER**,  
499 Unit (2009).
- 500 30. Chan, T., Rittenhouse, S. & Tschlis, P. AKT/PKB and other D3 phosphoinositide-  
501 regulated kinases: kinase activation by phosphoinositide-dependent phosphorylation.  
502 *Annu. Rev. Biochem.* **68**, 965–1014 (1999).
- 503 31. Ballif, B. A. *et al.* Quantitative phosphorylation profiling of the ERK/p90 ribosomal S6  
504 kinase-signaling cassette and its targets, the tuberous sclerosis tumor suppressors. *Proc.*  
505 *Natl. Acad. Sci.* **102**, 667–672 (2005).
- 506 32. Carriere, A. *et al.* ERK1/2 Phosphorylate Raptor to Promote Ras-dependent Activation of  
507 mTOR Complex 1 (mTORC1). *J. Biol. Chem.* **286**, 567 (2011).
- 508 33. Hassan, B., Akcakanat, A., AM, H. & F, M.-B. Targeting the PI3-kinase/Akt/mTOR  
509 signaling pathway. *Surg. Oncol. Clin. N. Am.* **22**, 641–664 (2013).

- 510 34. Hemmings, B. & Restuccia, D. PI3K-PKB/Akt pathway. *Cold Spring Harb. Perspect.*  
511 *Biol.* **4**, (2012).
- 512 35. Ma, L., Z, C., H, E.-B., P, T. & PP, P. Phosphorylation and functional inactivation of  
513 TSC2 by Erk implications for tuberous sclerosis and cancer pathogenesis. *Cell* **121**, 179–  
514 193 (2005).
- 515 36. Roux, P., BA, B., R, A., SP, G. & J, B. Tumor-promoting phorbol esters and activated Ras  
516 inactivate the tuberous sclerosis tumor suppressor complex via p90 ribosomal S6 kinase.  
517 *Proc. Natl. Acad. Sci. U. S. A.* **101**, 13489–13494 (2004).
- 518 37. Holt, C. E., Martin, K. C. & Schuman, E. M. Local translation in neurons: visualization  
519 and function. *Nat. Struct. Mol. Biol.* 2019 267 **26**, 557–566 (2019).
- 520 38. Merianda, T. T. *et al.* A functional equivalent of endoplasmic reticulum and Golgi in  
521 axons for secretion of locally synthesized proteins. *Mol. Cell. Neurosci.* **40**, 128–142  
522 (2008).
- 523 39. Murashov, A. K. *et al.* RNAi pathway is functional in peripheral nerve axons. *FASEB J.*  
524 **21**, 656–670 (2007).
- 525 40. Broeke, C. Van den *et al.* Alphaherpesvirus US3-mediated reorganization of the actin  
526 cytoskeleton is mediated by group A p21-activated kinases. *Proc. Natl. Acad. Sci.* **106**,  
527 8707–8712 (2009).
- 528 41. Frost, J. A. *et al.* Stimulation of NFB Activity by Multiple Signaling Pathways Requires  
529 PAK1\*. (2000) doi:10.1074/jbc.M909860199.
- 530 42. Bagrodia, S., Dé Rijard, B., Davis, R. J. & Cerione, R. A. Cdc42 and PAK-mediated

- 531            Signaling Leads to Jun Kinase and p38 Mitogen-activated Protein Kinase Activation\*.  
532            (1995).
- 533    43.    Zhang, S. *et al.* Rho Family GTPases Regulate p38 Mitogen-activated Protein Kinase  
534            through the Downstream Mediator Pak1\*. (1995).
- 535    44.    Polverino, A. *et al.* Activation of Mitogen-activated Protein Kinase Cascades by p21-  
536            activated Protein Kinases in Cell-free Extracts of *Xenopus* Oocytes\*. (1995).
- 537    45.    Sells, M. A. *et al.* Human p21-activated kinase (Pak1) regulates actin organization in  
538            mammalian cells. (1997).
- 539    46.    Frost, J. A. *et al.* Cross-cascade activation of ERKs and ternary complex factors by Rho  
540            family proteins. *EMBO J.* **16**, 6426–6438 (1997).
- 541    47.    Tang, Y. I. *et al.* *Kinase-Deficient Pak1 Mutants Inhibit Ras Transformation of Rat-1*  
542            *Fibroblasts. MOLECULAR AND CELLULAR BIOLOGY* vol. 17  
543            <https://journals.asm.org/journal/mcb> (1997).
- 544    48.    Frost, J. A., Xu, S., Hutchison, M. R., Marcus, S. & Cobb, M. H. *Actions of Rho Family*  
545            *Small G Proteins and p21-Activated Protein Kinases on Mitogen-Activated Protein*  
546            *Kinase Family Members. MOLECULAR AND CELLULAR BIOLOGY* vol. 16  
547            <https://journals.asm.org/journal/mcb> (1996).
- 548    49.    Thillai, K., Lam, H., Sarker, D. & Wells, C. M. Deciphering the link between PI3K and  
549            PAK: An opportunity to target key pathways in pancreatic cancer? *Oncotarget* **8**, 14173  
550            (2017).
- 551    50.    Liu, J.-J. Regulation of dynein-dynactin-driven vesicular transport. (2017)

552 doi:10.1111/tra.12475.

553 51. Höök, P. & Vallee, R. B. The dynein family at a glance. *J. Cell Sci.* **119**, 4369–4371

554 (2006).

555 52. Pfister, K. *et al.* Genetic analysis of the cytoplasmic dynein subunit families. *PLoS Genet.*

556 **2**, 11–26 (2006).

557 53. Pfister, K. *et al.* Cytoplasmic dynein nomenclature. *J. Cell Biol.* **171**, 411 (2005).

558 54. Nyarko, A. & Barbar, E. Light chain-dependent self-association of dynein intermediate

559 chain. *J. Biol. Chem.* **286**, 1556–1566 (2011).

560 55. Kardon, J. & Vale, R. Regulators of the cytoplasmic dynein motor. *Nat. Rev. Mol. Cell*

561 *Biol.* **10**, 854–865 (2009).

562 56. Chowdhury, S., Ketcham, S., Schroer, T. & Lander, G. Structural organization of the

563 dynein-dynactin complex bound to microtubules. *Nat. Struct. Mol. Biol.* **22**, 345–347

564 (2015).

565 57. Olenick, M. & Holzbaur, E. Dynein activators and adaptors at a glance. *J. Cell Sci.* **132**,

566 (2019).

567 58. Musarrat, F. Cellular and Viral Determinants of Hsv-1 Entry and Transport. (2019).

568 59. Peeters, B., de Wind, N., Broer, R., Gielkens, A. & Moormann, R. Glycoprotein H of

569 pseudorabies virus is essential for entry and cell-to-cell spread of the virus. *J. Virol.* **66**,

570 3888–3892 (1992).

571 60. Del Rio, T., Ch'ng, T. H., Flood, E. A., Gross, S. P. & Enquist, L. W. Heterogeneity of a

- 572           Fluorescent Tegument Component in Single Pseudorabies Virus Virions and Enveloped  
573           Axonal Assemblies. *J. Virol.* **79**, 3903 (2005).
- 574   61.   Curanovic, D. & Enquist, L. W. Virion-incorporated glycoprotein B mediates  
575           transneuronal spread of pseudorabies virus. *J. Virol.* **83**, 7796–7804 (2009).
- 576   62.   Abramoff, M., Magalhaes, P. & Ram, S. Image Processing with ImageJ. *Biophotonics Int.*  
577           **11**, 36–42 (2004).

578

579

580 **Figure Legends**

581 **Fig 1 Akt is phosphorylated in axons during PRV infection.** (A) A Campenot tri-chamber  
582 neuronal culture system divided into soma (S), middle (M), and neurite (N) compartments used  
583 to separate neuronal cell bodies from axons. Addition of virus or drug into the N compartment  
584 allows for the study of axonal responses independent of the cell body. (B and C) Immunoblot of  
585 p-S<sup>473</sup>-Akt in axons infected with PRV 180 in the N compartment. (B) Infections continued for  
586 0min, 15min, 30min, 60min, and 180min. (C and D) N compartments were pretreated with  
587 LY294,002, Akt inhibitor VIII, rapamycin, or cycloheximide prior to infection. (C) N  
588 compartments were harvested 1hpi. (D) S compartments were harvested 1hpi in the N  
589 compartment. (C and D) p-S<sup>473</sup>-Akt bands were normalized to total-Akt bands using a  
590 densitometry assay. Mean  $\pm$  Std Dev with n = 3 for each condition are plotted with \*\*  $p \leq 0.01$ ,  
591 \*\*\*  $p \leq 0.001$ , using a one-way ANOVA (ns = not significant).

592 **Fig 2 Disruption of Akt signaling pathways reduced PRV retrograde infection.** (A) N  
593 compartment axons were treated with FAST-DiO 12hr prior to infection. PRV 180 or PRV 823  
594 were added to axons and at 12hpi S compartment cell bodies were tile-imaged. For conditions  
595 involving inhibitor treatment, inhibitor was added to N compartments 1hr prior to infection and  
596 at 6hpi unabsorbed virus inoculum and inhibitor were removed from the N compartment. (B)  
597 Tile-images of neuron cell bodies in S compartments. Scale bar represents 500um. (C)  
598 Quantification of primarily infected cells. The ratio of dual-colored to total green cell bodies for  
599 each condition was calculated. Mean  $\pm$  Std Dev with n = 10 chambers for each condition are  
600 plotted with \*\*\*  $p \leq 0.001$ , using a one-way ANOVA (ns = not significant).

601 **Fig 3 Quantification of PRV transport kinetics in axons.** (A) N compartments were infected  
602 with PRV 180 or PRV 823. 2hpi 30sec videos of moving nucleocapsids in M compartments were  
603 recorded. Inhibitor was added to N compartments 1hr prior to infection when specified. (B)  
604 Maximum intensity projections (bottom) were created from the videos to visualize nucleocapsid  
605 displacement. Moving nucleocapsids are represented as tracks in the image (red box).  
606 Kymographs (top) were made from the maximum intensity projections to visualize nucleocapsid  
607 velocity throughout the recording process. Diagonal lines starting from the upper right corner  
608 represent retrograde movement. Horizontal lines represent stationary nucleocapsids. (C)  
609 Quantification of the number of moving nucleocapsids in M compartments. (D) The  
610 displacement of individual nucleocapsids over the 30sec recordings were measured for each  
611 condition. (E) The average velocity of the nucleocapsids moving in the retrograde direction were  
612 calculated by acquiring the mean of all instantaneous velocities  $\geq 1\mu\text{m}/\text{sec}$ . Data represent mean  
613  $\pm$  Std Dev with  $n = 7$  chambers and 5 fields of view per chamber. \*\*\*\*  $p \leq 0.0001$ , \*\*\*  $p \leq$   
614  $0.001$ , \*\*  $p \leq 0.01$ , \*  $p \leq 0.05$  using a one-way ANOVA (ns= not significant).

615

616 **Fig 4 Akt phosphorylation in axons occurred after entry of PRV into the cytoplasm.**

617 Immunoblot of p-S<sup>473</sup>-Akt in axons infected with PRV 180, PRV 233, or PRV GS442 in N  
618 compartments. p-S<sup>473</sup>-Akt bands were normalized to total-Akt bands using a densitometry assay.  
619 Mean  $\pm$  Std Dev with  $n = 3$  for each condition are plotted with \*  $p \leq 0.05$ , using a one-way  
620 ANOVA.

621 **Fig 5 US3 induced Akt phosphorylation in axons.** Immunoblot of p-S<sup>473</sup>-Akt in axons infected  
622 with PRV 180, PRV 813NS, PRV 815KD or PRV 813R in N compartments. p-S<sup>473</sup>-Akt bands



623 were normalized to total-Akt bands using a densitometry assay. Mean  $\pm$  Std Dev with  $n = 3$  for  
624 each condition are plotted with \*  $p \leq 0.05$ , using a one-way ANOVA.

625 **Fig 6 US3 does not affect entry of PRV into cells.** Fluorescence imaging of PRV 180 and PRV  
626 823 nucleocapsids in Rat2 fibroblasts. A synchronized infection assay was used to allow entry of  
627 all bound virion particles to occur simultaneously. Nucleocapsids that entered the cytoplasm  
628 were manually counted. Data represents mean  $\pm$  Std Dev with 5 replicates and 2-5 cells per  
629 replicate for each condition using an unpaired t-test (ns = not significant).

630 **Fig 7 US3 and Akt phosphorylation are required for virus-induced translation in axons.** A)  
631 N compartments were infected with PRV 180 for 1hr prior to harvest. Puromycin was added to N  
632 compartments at 45mpi to label nascent peptides. B) Immunoblot of puromycin incorporated  
633 peptides from axons in the N compartment. PRV 180 or PRV 813NS were added to N  
634 compartments for 1hr. Puromycin was added to N compartments 45mpi. Inhibitor was added 1hr  
635 prior to infection when specified. A single band is visible for each condition in this blot,  
636 representing the most abundant peptide synthesized at the time of incubation. Other peptide  
637 bands become visible at higher exposure times.

638 **Fig 8 The model PRV-induced translation in axons.** 1) PRV virions bind to nectin-1 receptors  
639 on the host-cell membrane. 2) Entry is mediated by fusion of the viral envelope with the cell's  
640 plasma membrane allowing nucleocapsid and tegument proteins to enter the cytoplasm. Inner  
641 tegument proteins (US3, UL36, and UL37) stay bound to nucleocapsids. 3) US3 stimulates a  
642 PI3K/Akt-mTORC1 signaling pathway to induce 4) translation of axonal mRNAs leading to Lis1  
643 expression. 5) Nucleocapsid engagement with the retrograde transport machinery is mediated by  
644 the inner tegument and Lis1 and 6) subsequent retrograde transport through the axon occurs.



# Figure 1

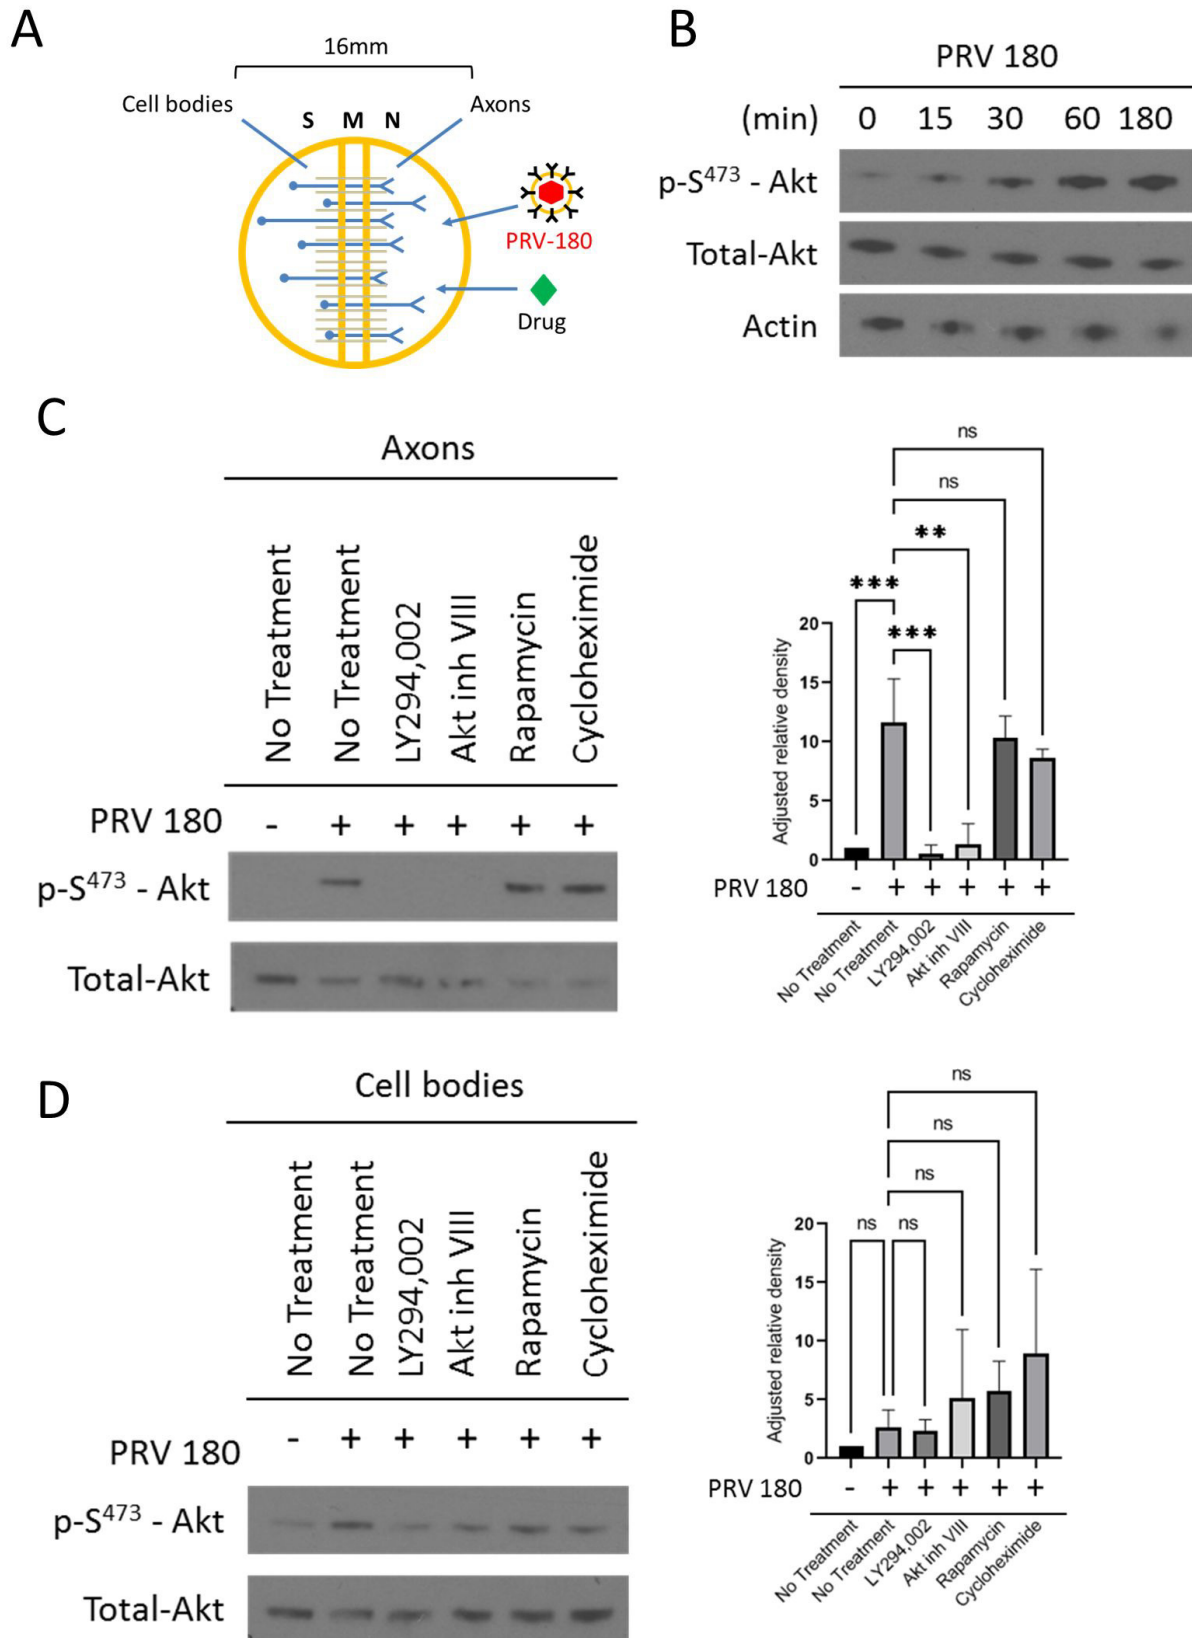

## Figure 2

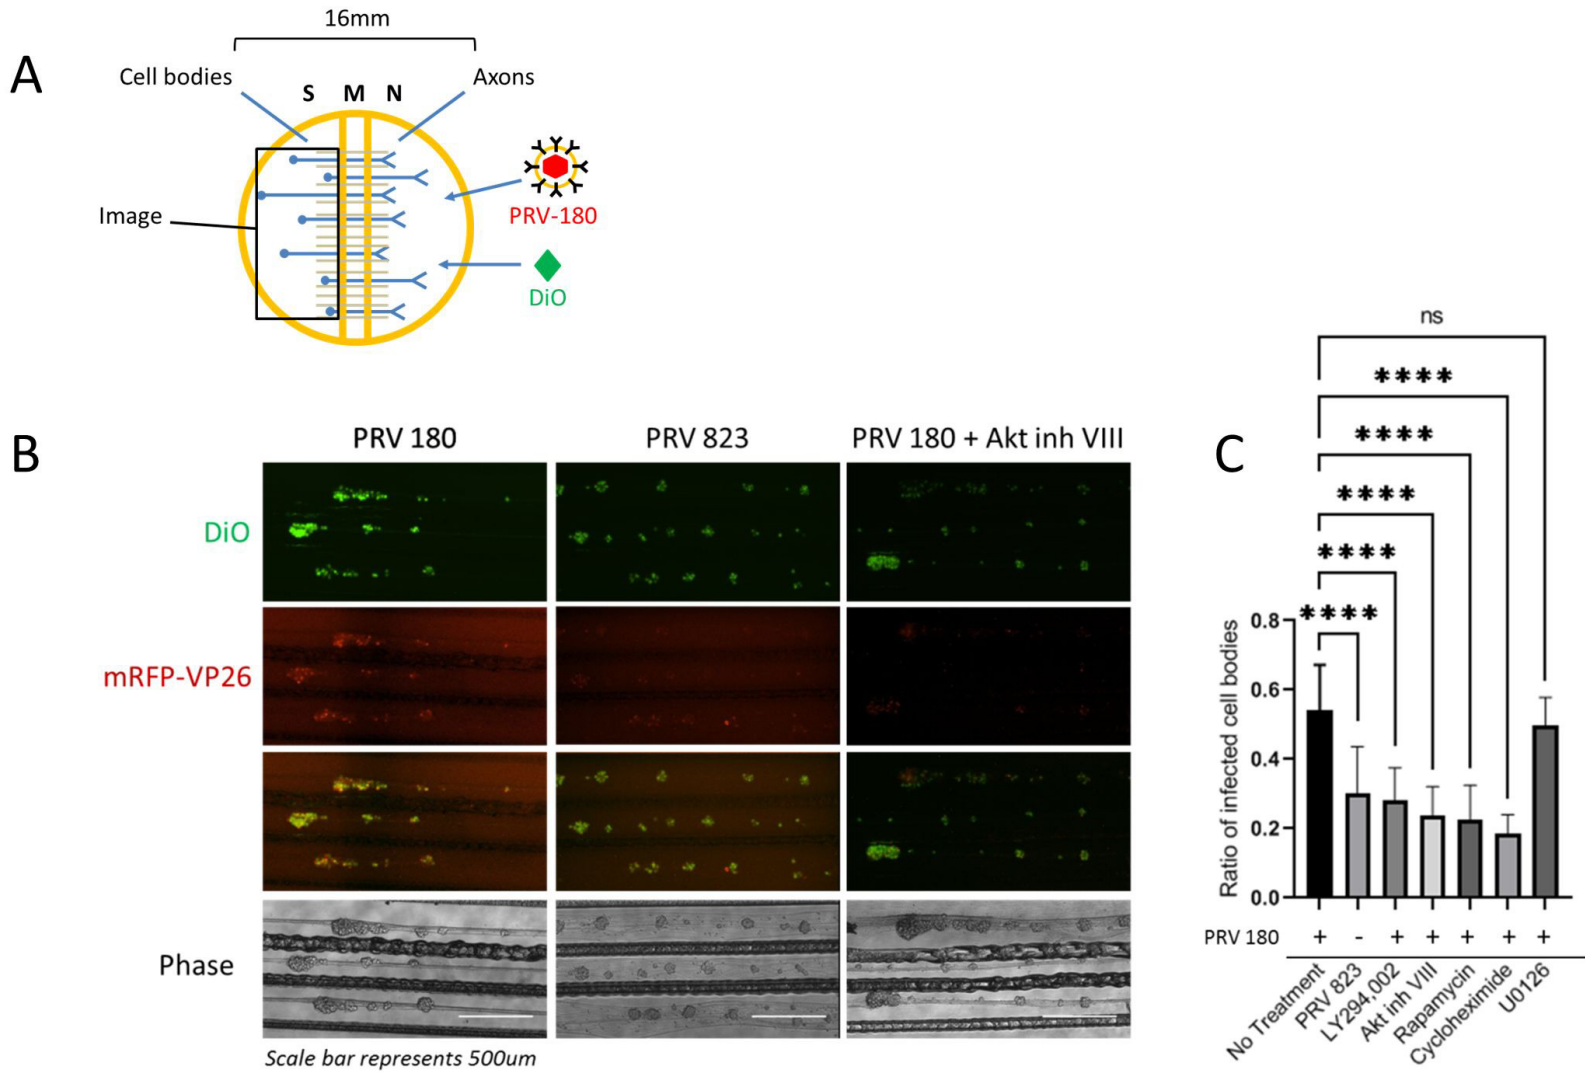

# Figure 3

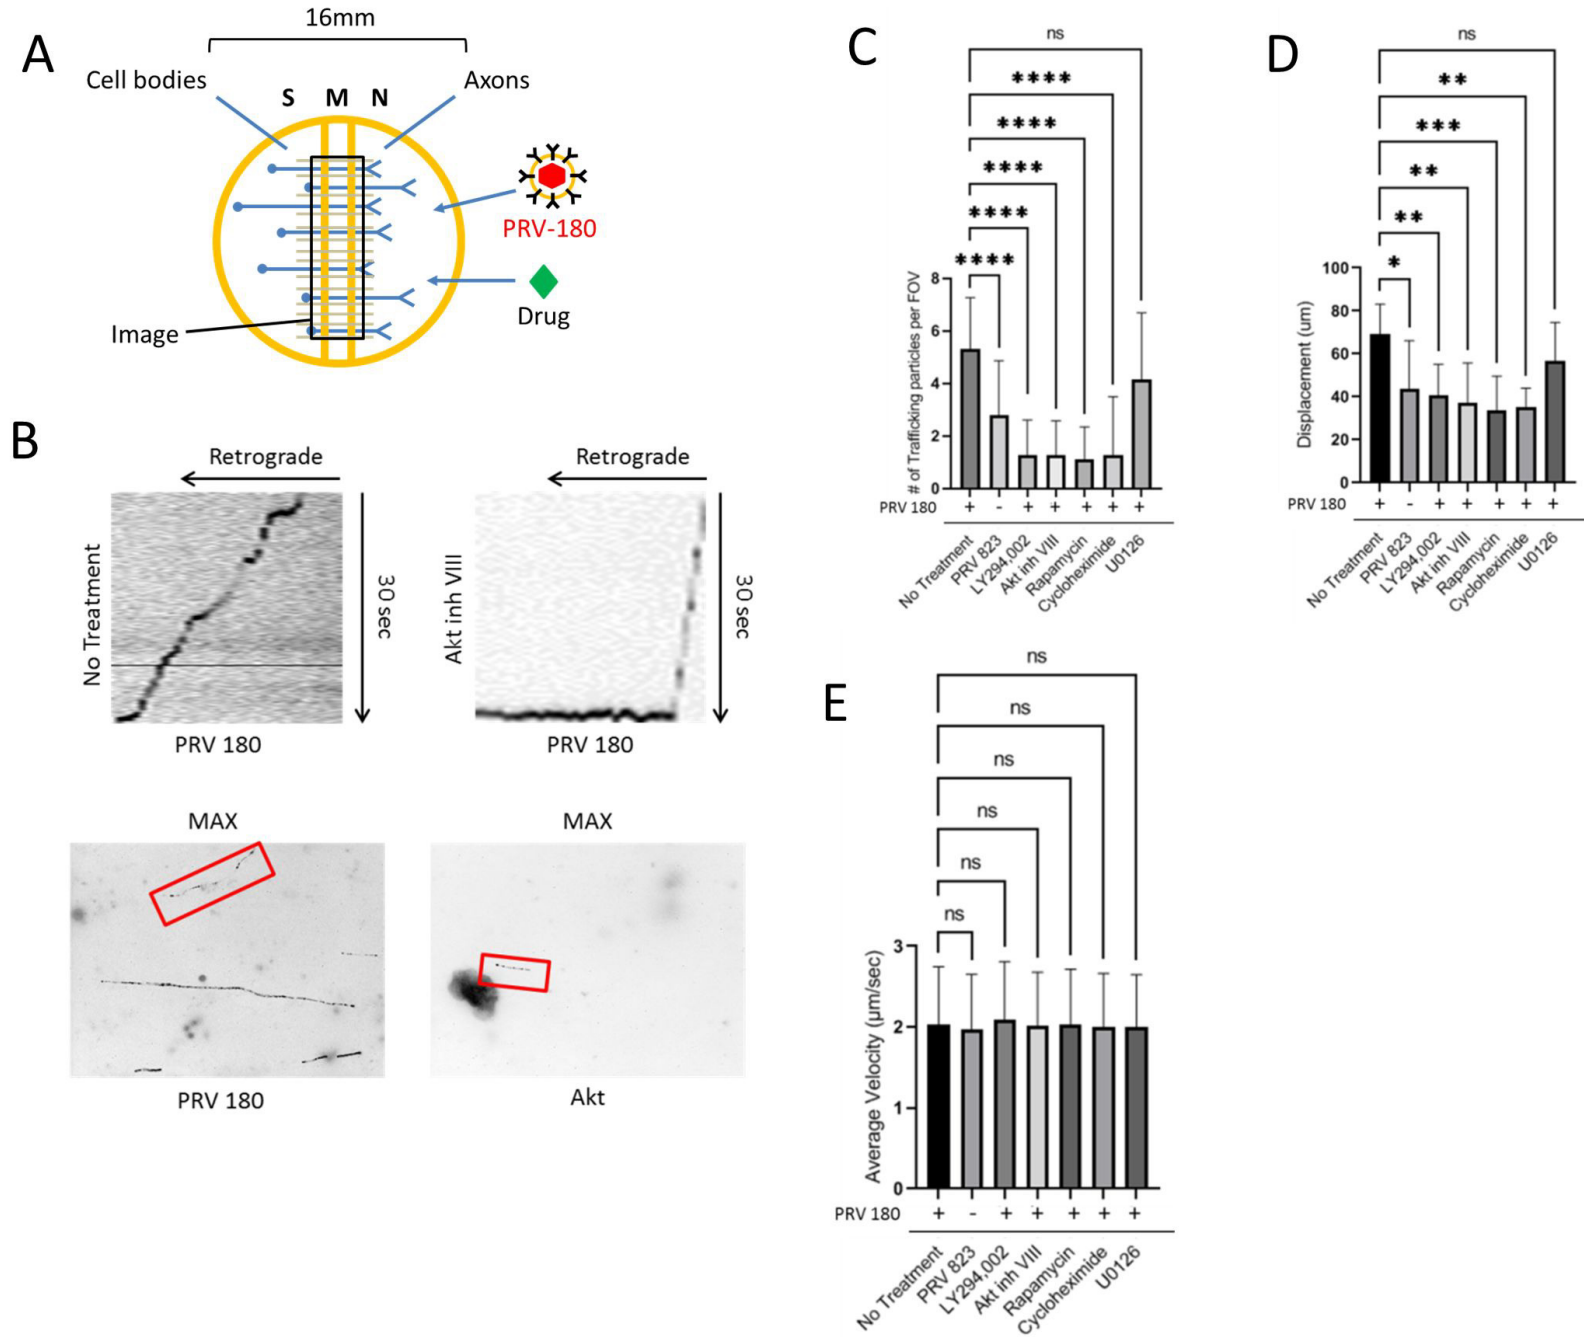

## Figure 4

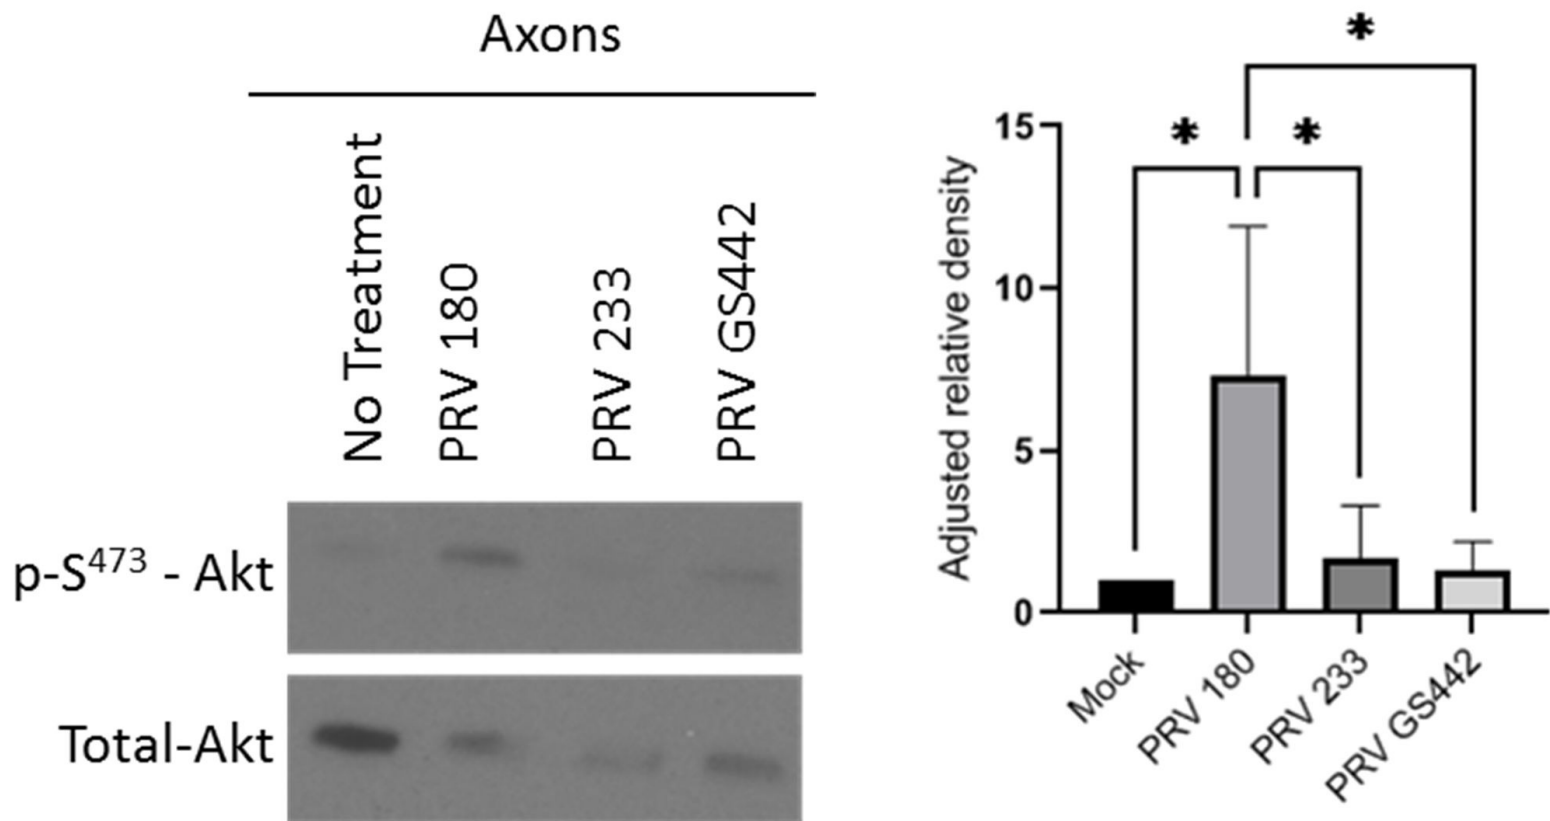

## Figure 5

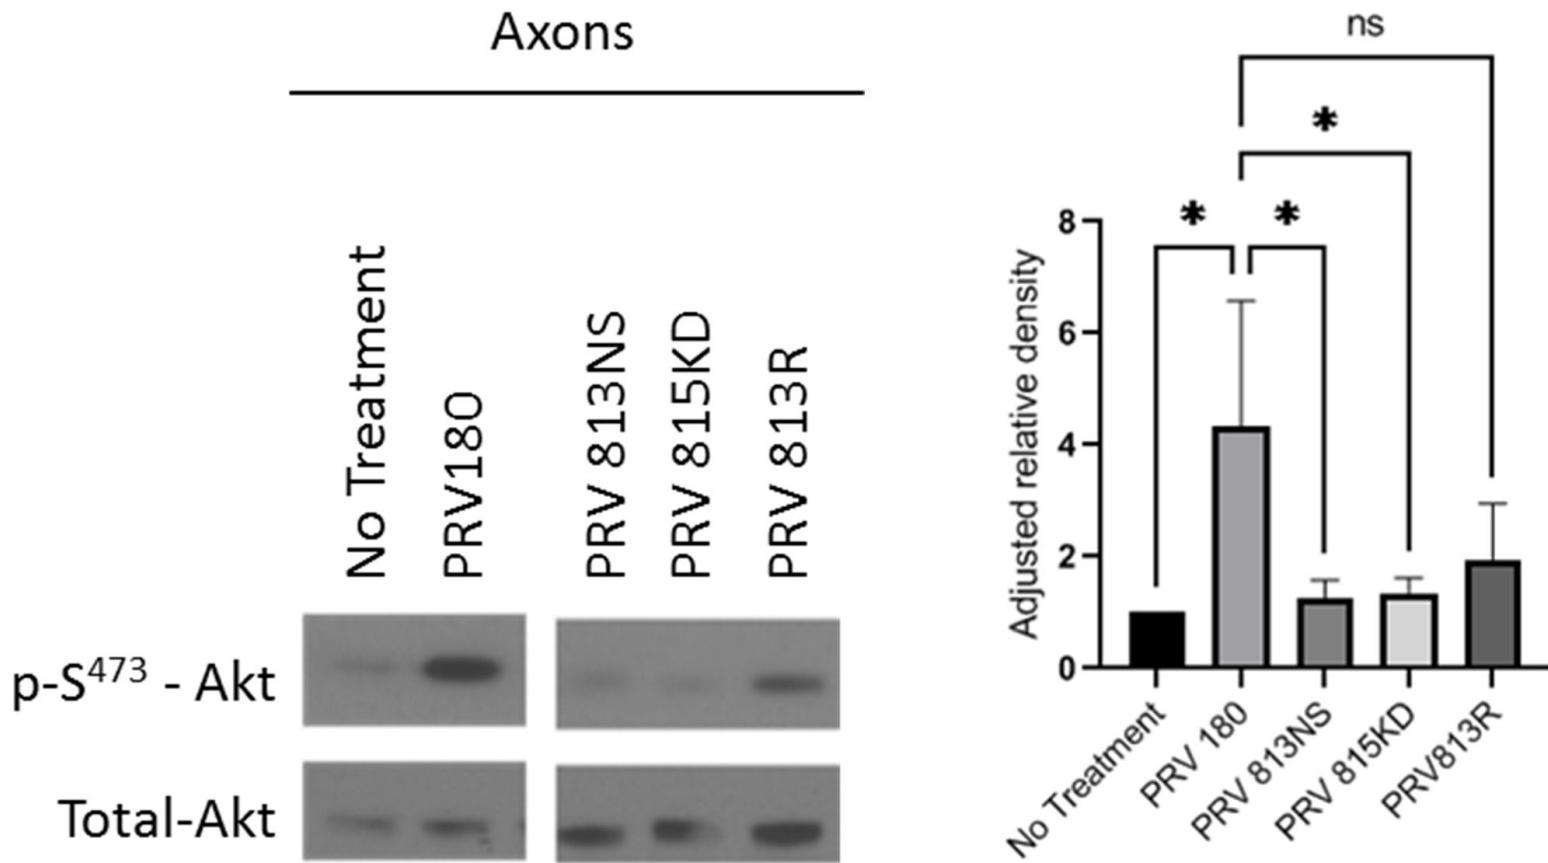

## Figure 6

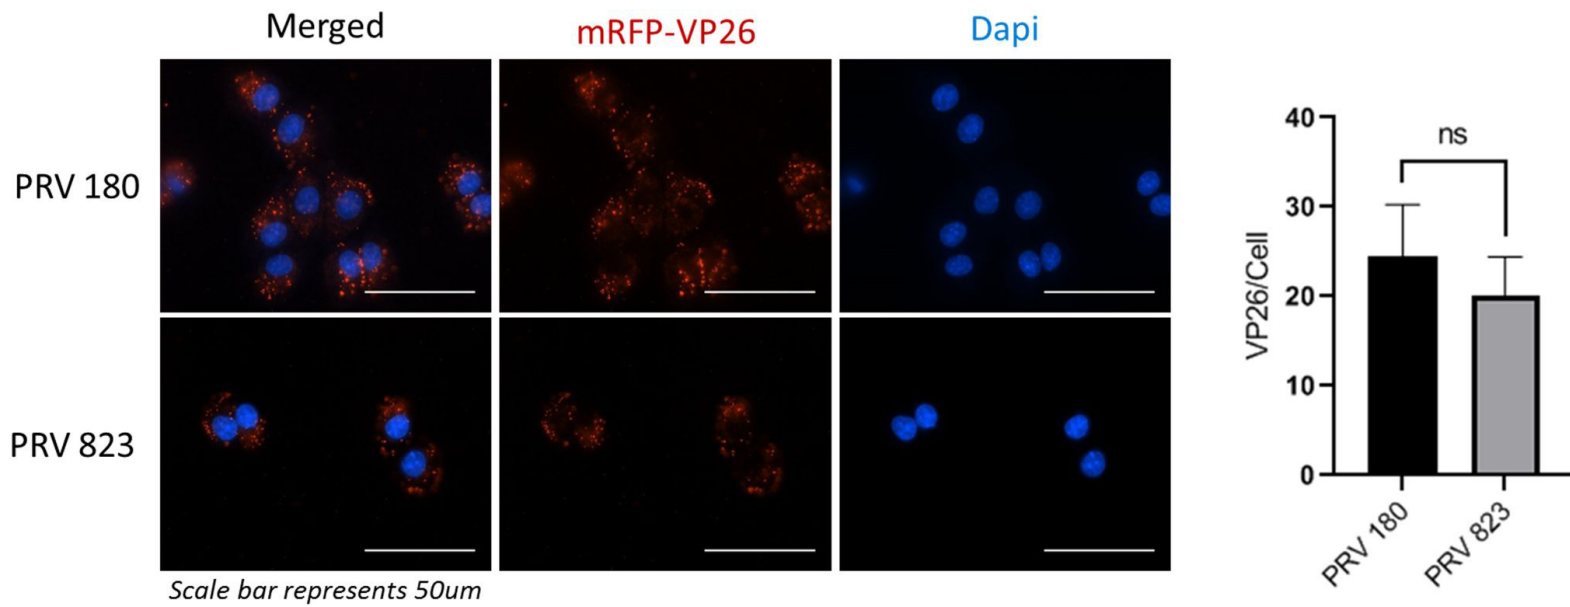



# Figure 7

A

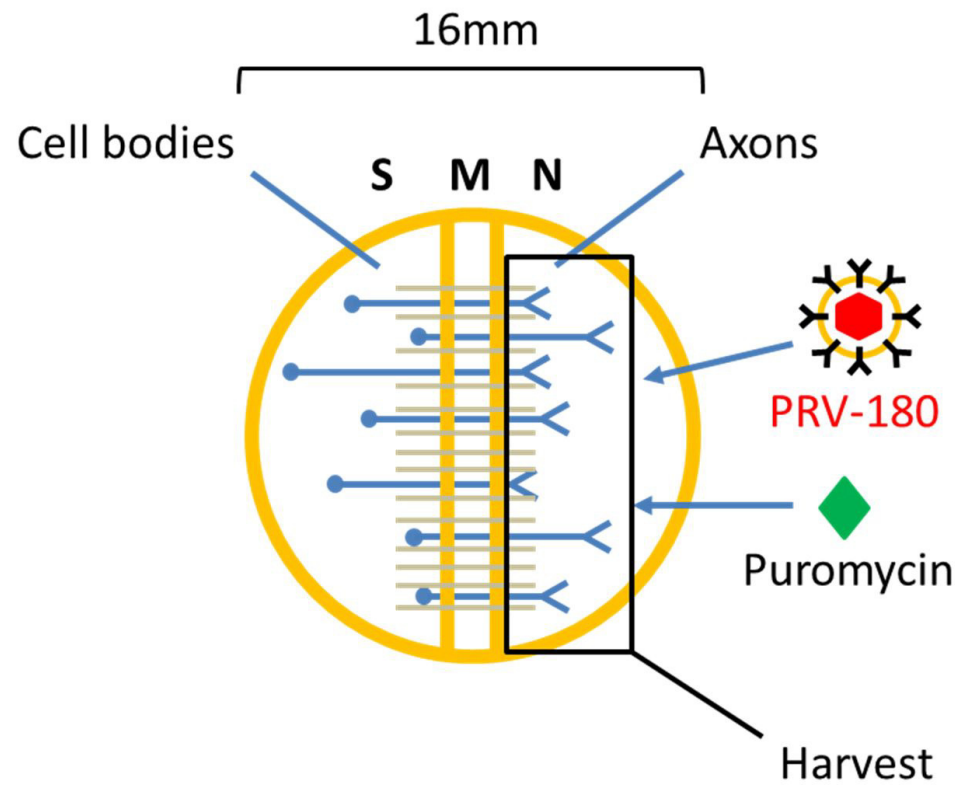

B

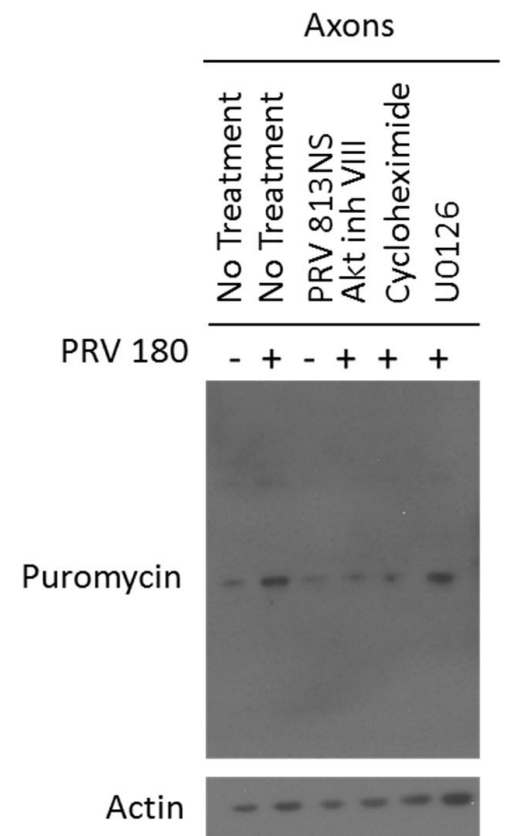

# Figure 8

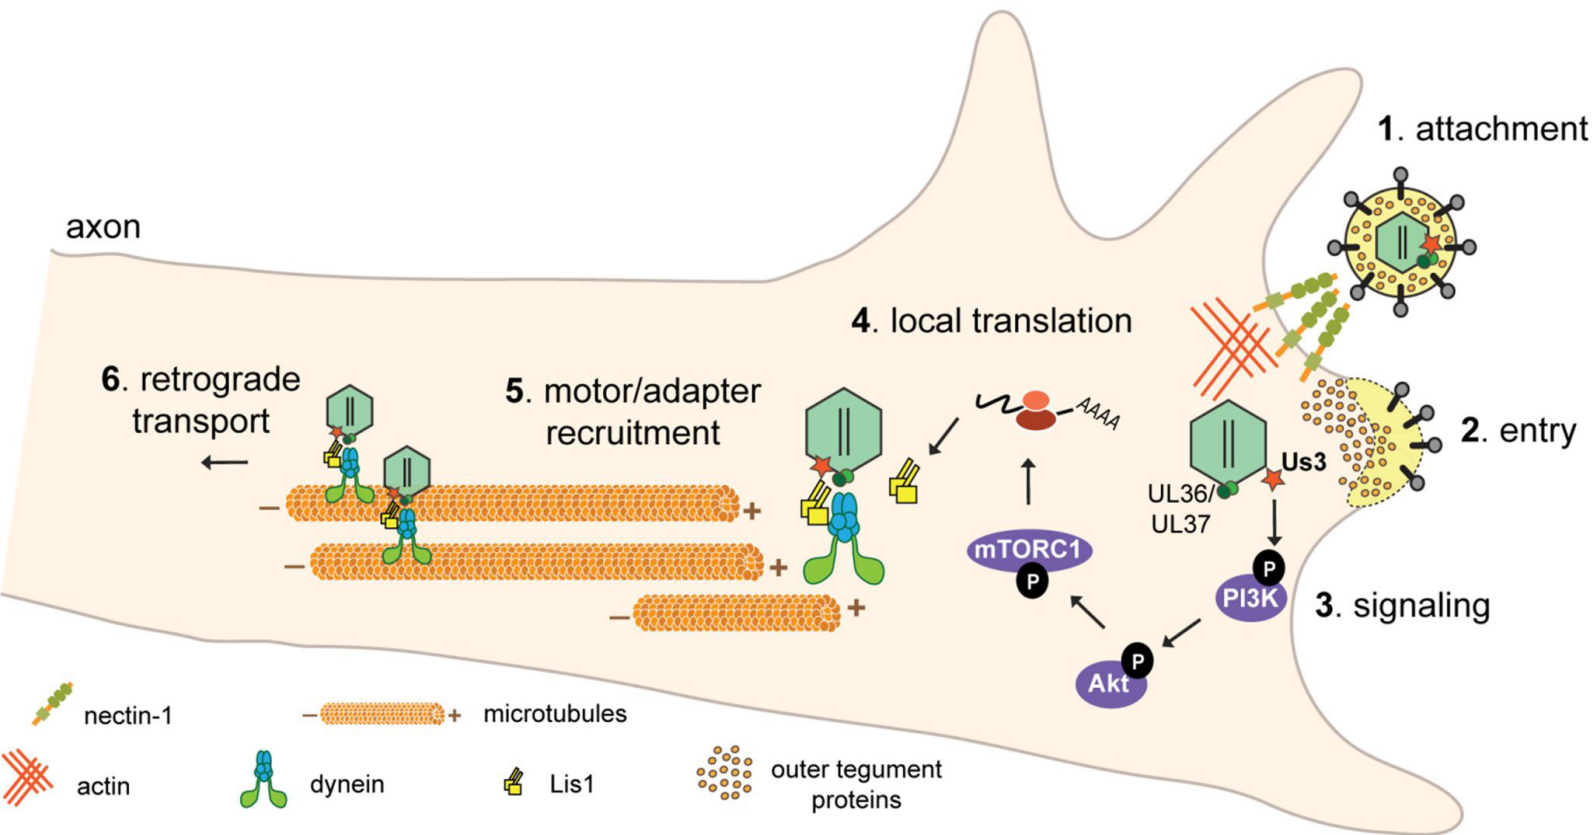

Source: https://www.biorxiv.org/content/10.1101/2021.10.12.464169v1.full.pdf
